# Supplementary material for: Transcriptome expression profile of compound-K-enriched red ginseng extract (DDK-401) in Korean volunteers and its apoptotic properties
Source: Front Pharmacol. 2022 Dec 1;13:999192. doi: 10.3389/fphar.2022.999192 (PMC9751427; doi:10.3389/fphar.2022.999192)
Supplement: Supplementary file 7 [file Table4.xlsx]

## Sheet: Supplementary Table 4
Supplementary Table 4: Summaryof KEGG pathway enrichment using DAVID online webserver (https://david.ncifcrf.gov/)
Category	Term	Count	%	PValue	Genes	List Total	Pop Hits	Pop Total	Fold Enrichment	Bonferroni	Benjamini	FDR
KEGG_PATHWAY	hsa04380:Osteoclast differentiation	22	4.22265	1.89672e-09	ENSG00000104365, ENSG00000198053, ENSG00000239998, ENSG00000158517, ENSG00000075426, ENSG00000162747, ENSG00000170581, ENSG00000104856, ENSG00000116701, ENSG00000131042, ENSG00000159128, ENSG00000170345, ENSG00000136238, ENSG00000115594, ENSG00000143226, ENSG00000244482, ENSG00000101307, ENSG00000100365, ENSG00000203747, ENSG00000067182, ENSG00000108984, ENSG00000033327	281	128	8156	4.98866	5.36773e-07	5.36773e-07	5.10219e-07
KEGG_PATHWAY	hsa05140:Leishmaniasis	13	2.4952	1.05907e-05	ENSG00000136869, ENSG00000158517, ENSG00000162747, ENSG00000179344, ENSG00000156508, ENSG00000116701, ENSG00000159128, ENSG00000170345, ENSG00000203710, ENSG00000143226, ENSG00000160255, ENSG00000100365, ENSG00000203747	281	77	8156	4.90031	0.0029927	0.00149858	0.00142445
KEGG_PATHWAY	hsa04145:Phagosome	17	3.26296	6.19588e-05	ENSG00000136869, ENSG00000158517, ENSG00000162747, ENSG00000179344, ENSG00000116701, ENSG00000136238, ENSG00000163131, ENSG00000170458, ENSG00000143226, ENSG00000079950, ENSG00000167552, ENSG00000160255, ENSG00000188229, ENSG00000185883, ENSG00000100365, ENSG00000203747, ENSG00000184009	281	152	8156	3.24621	0.017382	0.00584478	0.00555564
KEGG_PATHWAY	hsa04613:Neutrophil extracellular trap formation	19	3.64683	8.75989e-05	ENSG00000136869, ENSG00000158517, ENSG00000162747, ENSG00000171051, ENSG00000116701, ENSG00000132475, ENSG00000136238, ENSG00000197405, ENSG00000159339, ENSG00000203710, ENSG00000101916, ENSG00000143226, ENSG00000103569, ENSG00000160255, ENSG00000100365, ENSG00000189403, ENSG00000203747, ENSG00000270882, ENSG00000184009	281	190	8156	2.90249	0.0244868	0.00619762	0.00589103
KEGG_PATHWAY	hsa04666:Fc gamma R-mediated phagocytosis	13	2.4952	0.000111406	ENSG00000158517, ENSG00000162747, ENSG00000136238, ENSG00000143226, ENSG00000172757, ENSG00000184381, ENSG00000130429, ENSG00000101336, ENSG00000115091, ENSG00000125753, ENSG00000182541, ENSG00000203747, ENSG00000033327	281	97	8156	3.88994	0.0310379	0.0063056	0.00599366
KEGG_PATHWAY	hsa05417:Lipid and atherosclerosis	20	3.83877	0.000141351	ENSG00000175197, ENSG00000183735, ENSG00000104365, ENSG00000136869, ENSG00000158517, ENSG00000173110, ENSG00000064012, ENSG00000044574, ENSG00000116701, ENSG00000170345, ENSG00000136238, ENSG00000170458, ENSG00000112096, ENSG00000121858, ENSG00000100985, ENSG00000120889, ENSG00000100365, ENSG00000067182, ENSG00000108984, ENSG00000165029	281	215	8156	2.69999	0.0392154	0.00666704	0.00633722
KEGG_PATHWAY	hsa04210:Apoptosis	15	2.87908	0.000225816	ENSG00000175197, ENSG00000104365, ENSG00000064012, ENSG00000099860, ENSG00000170345, ENSG00000003402, ENSG00000163131, ENSG00000167552, ENSG00000121858, ENSG00000120889, ENSG00000100368, ENSG00000067182, ENSG00000140379, ENSG00000184009, ENSG00000164733	281	136	8156	3.20128	0.0619136	0.00912942	0.00867779
KEGG_PATHWAY	hsa04064:NF-kappa B signaling pathway	12	2.30326	0.000839209	ENSG00000115594, ENSG00000104365, ENSG00000170458, ENSG00000136869, ENSG00000118503, ENSG00000125735, ENSG00000121060, ENSG00000104856, ENSG00000099860, ENSG00000067182, ENSG00000140379, ENSG00000003402	281	104	8156	3.34903	0.211479	0.029687	0.0282184
KEGG_PATHWAY	hsa05130:Pathogenic Escherichia coli infection	17	3.26296	0.00118703	ENSG00000149273, ENSG00000104365, ENSG00000136869, ENSG00000064012, ENSG00000170345, ENSG00000136238, ENSG00000139644, ENSG00000115594, ENSG00000143226, ENSG00000167552, ENSG00000121858, ENSG00000120889, ENSG00000130429, ENSG00000115091, ENSG00000188229, ENSG00000067182, ENSG00000184009	281	197	8156	2.50469	0.28547	0.0373256	0.0354791
KEGG_PATHWAY	hsa05164:Influenza A	15	2.87908	0.00220626	ENSG00000183735, ENSG00000104365, ENSG00000136869, ENSG00000105323, ENSG00000064012, ENSG00000179344, ENSG00000170581, ENSG00000121060, ENSG00000112576, ENSG00000159128, ENSG00000121858, ENSG00000120889, ENSG00000183486, ENSG00000067182, ENSG00000184009	281	171	8156	2.54604	0.464771	0.0578494	0.0549876
KEGG_PATHWAY	hsa05132:Salmonella infection	19	3.64683	0.00224856	ENSG00000149273, ENSG00000104365, ENSG00000136869, ENSG00000064012, ENSG00000182718, ENSG00000170345, ENSG00000136238, ENSG00000170458, ENSG00000081059, ENSG00000186432, ENSG00000167552, ENSG00000121858, ENSG00000120889, ENSG00000130429, ENSG00000115091, ENSG00000188229, ENSG00000067182, ENSG00000108984, ENSG00000184009	281	249	8156	2.21475	0.471155	0.0578494	0.0549876
KEGG_PATHWAY	hsa05135:Yersinia infection	13	2.4952	0.00257085	ENSG00000183735, ENSG00000104365, ENSG00000136869, ENSG00000170345, ENSG00000136238, ENSG00000143226, ENSG00000130429, ENSG00000115091, ENSG00000089159, ENSG00000103313, ENSG00000082074, ENSG00000108984, ENSG00000184009	281	137	8156	2.75419	0.517361	0.0606291	0.0576298
KEGG_PATHWAY	hsa04620:Toll-like receptor signaling pathway	11	2.11132	0.00293415	ENSG00000183735, ENSG00000101916, ENSG00000104365, ENSG00000170458, ENSG00000136869, ENSG00000064012, ENSG00000128604, ENSG00000174125, ENSG00000170345, ENSG00000136238, ENSG00000108984	281	104	8156	3.06994	0.564642	0.0638743	0.0607144
KEGG_PATHWAY	hsa05152:Tuberculosis	15	2.87908	0.00353457	ENSG00000136869, ENSG00000162747, ENSG00000064012, ENSG00000179344, ENSG00000174125, ENSG00000159128, ENSG00000203710, ENSG00000163131, ENSG00000170458, ENSG00000143226, ENSG00000160255, ENSG00000185883, ENSG00000203747, ENSG00000067182, ENSG00000166523	281	180	8156	2.41874	0.632876	0.0714488	0.0679143
KEGG_PATHWAY	hsa04142:Lysosome	12	2.30326	0.00559407	ENSG00000163131, ENSG00000110911, ENSG00000189067, ENSG00000104763, ENSG00000166340, ENSG00000188603, ENSG00000185883, ENSG00000125447, ENSG00000197081, ENSG00000018280, ENSG00000164733, ENSG00000109323	281	132	8156	2.63863	0.795578	0.105541	0.10032
KEGG_PATHWAY	hsa04640:Hematopoietic cell lineage	10	1.91939	0.006769	ENSG00000010278, ENSG00000203710, ENSG00000115594, ENSG00000119535, ENSG00000170458, ENSG00000179344, ENSG00000158473, ENSG00000166825, ENSG00000122025, ENSG00000196549	281	99	8156	2.93181	0.853706	0.119727	0.113804
KEGG_PATHWAY	hsa04217:Necroptosis	13	2.4952	0.00846858	ENSG00000136869, ENSG00000064012, ENSG00000170581, ENSG00000135821, ENSG00000159128, ENSG00000003402, ENSG00000167996, ENSG00000118503, ENSG00000121858, ENSG00000100504, ENSG00000120889, ENSG00000189403, ENSG00000067182	281	159	8156	2.37311	0.909898	0.140977	0.134003
KEGG_PATHWAY	hsa05131:Shigellosis	17	3.26296	0.0108732	ENSG00000183735, ENSG00000104365, ENSG00000136869, ENSG00000132475, ENSG00000150991, ENSG00000136238, ENSG00000115594, ENSG00000170458, ENSG00000118689, ENSG00000184584, ENSG00000160201, ENSG00000130429, ENSG00000115091, ENSG00000089159, ENSG00000184640, ENSG00000067182, ENSG00000184009	281	247	8156	1.99767	0.954679	0.170951	0.162494
KEGG_PATHWAY	hsa05134:Legionellosis	7	1.34357	0.0129734	ENSG00000203710, ENSG00000170458, ENSG00000136869, ENSG00000173110, ENSG00000064012, ENSG00000160255, ENSG00000156508	281	57	8156	3.56446	0.975165	0.193235	0.183676
KEGG_PATHWAY	hsa05170:Human immunodeficiency virus 1 infection	15	2.87908	0.0140737	ENSG00000183735, ENSG00000104365, ENSG00000136869, ENSG00000242616, ENSG00000128383, ENSG00000064012, ENSG00000170345, ENSG00000136238, ENSG00000172757, ENSG00000184584, ENSG00000089159, ENSG00000182541, ENSG00000067182, ENSG00000108984, ENSG00000166710	281	212	8156	2.05365	0.981887	0.197239	0.187482
KEGG_PATHWAY	hsa04668:TNF signaling pathway	10	1.91939	0.0146361	ENSG00000104365, ENSG00000069399, ENSG00000118503, ENSG00000064012, ENSG00000100985, ENSG00000146592, ENSG00000170345, ENSG00000067182, ENSG00000003402, ENSG00000108984	281	112	8156	2.59151	0.984588	0.197239	0.187482
KEGG_PATHWAY	hsa04936:Alcoholic liver disease	11	2.11132	0.0240845	ENSG00000183735, ENSG00000104365, ENSG00000170458, ENSG00000136869, ENSG00000118689, ENSG00000081059, ENSG00000064012, ENSG00000067182, ENSG00000072778, ENSG00000108984, ENSG00000197405	281	142	8156	2.24841	0.998992	0.302292	0.287338
KEGG_PATHWAY	hsa04010:MAPK signaling pathway	18	3.45489	0.0245679	ENSG00000175197, ENSG00000104365, ENSG00000173110, ENSG00000114738, ENSG00000104856, ENSG00000099860, ENSG00000170345, ENSG00000136238, ENSG00000171777, ENSG00000115594, ENSG00000170458, ENSG00000141480, ENSG00000125952, ENSG00000067182, ENSG00000108984, ENSG00000163235, ENSG00000122025, ENSG00000140443	281	294	8156	1.77704	0.999123	0.302292	0.287338
KEGG_PATHWAY	hsa05167:Kaposi sarcoma-associated herpesvirus infection	13	2.4952	0.0348477	ENSG00000183735, ENSG00000104365, ENSG00000242616, ENSG00000064012, ENSG00000170581, ENSG00000170345, ENSG00000150991, ENSG00000136238, ENSG00000081059, ENSG00000101336, ENSG00000067182, ENSG00000108984, ENSG00000128016	281	194	8156	1.94497	0.999956	0.40056	0.380744
KEGG_PATHWAY	hsa05145:Toxoplasmosis	9	1.72745	0.0384484	ENSG00000104365, ENSG00000136869, ENSG00000012779, ENSG00000173110, ENSG00000064012, ENSG00000179344, ENSG00000159128, ENSG00000067182, ENSG00000108984	281	112	8156	2.33236	0.999985	0.40056	0.380744
KEGG_PATHWAY	hsa05166:Human T-cell leukemia virus 1 infection	14	2.68714	0.0419784	ENSG00000104365, ENSG00000134954, ENSG00000179344, ENSG00000146592, ENSG00000104856, ENSG00000112576, ENSG00000120738, ENSG00000170345, ENSG00000157557, ENSG00000115594, ENSG00000160255, ENSG00000067182, ENSG00000166710, ENSG00000128016	281	222	8156	1.8304	0.999995	0.40056	0.380744
KEGG_PATHWAY	hsa04670:Leukocyte transendothelial migration	9	1.72745	0.0420068	ENSG00000158517, ENSG00000100985, ENSG00000125753, ENSG00000089159, ENSG00000160255, ENSG00000116701, ENSG00000100365, ENSG00000136238, ENSG00000184009	281	114	8156	2.29144	0.999995	0.40056	0.380744
KEGG_PATHWAY	hsa04657:IL-17 signaling pathway	8	1.53551	0.0423186	ENSG00000183735, ENSG00000104365, ENSG00000163220, ENSG00000143546, ENSG00000118503, ENSG00000064012, ENSG00000100985, ENSG00000170345	281	94	8156	2.47021	0.999995	0.40056	0.380744
KEGG_PATHWAY	hsa05169:Epstein-Barr virus infection	13	2.4952	0.0452147	ENSG00000183735, ENSG00000104365, ENSG00000064012, ENSG00000179344, ENSG00000170581, ENSG00000104856, ENSG00000112576, ENSG00000099860, ENSG00000136238, ENSG00000118503, ENSG00000138185, ENSG00000108984, ENSG00000166710	281	202	8156	1.86794	0.999998	0.40056	0.380744
KEGG_PATHWAY	hsa05163:Human cytomegalovirus infection	14	2.68714	0.0459085	ENSG00000183735, ENSG00000104365, ENSG00000242616, ENSG00000180871, ENSG00000064012, ENSG00000146592, ENSG00000136238, ENSG00000115594, ENSG00000184584, ENSG00000089159, ENSG00000165699, ENSG00000067182, ENSG00000108984, ENSG00000166710	281	225	8156	1.80599	0.999998	0.40056	0.380744
KEGG_PATHWAY	hsa05150:Staphylococcus aureus infection	8	1.53551	0.0465566	ENSG00000143226, ENSG00000162747, ENSG00000171051, ENSG00000179344, ENSG00000160255, ENSG00000203747, ENSG00000197405, ENSG00000108244	281	96	8156	2.41874	0.999999	0.40056	0.380744
KEGG_PATHWAY	hsa05100:Bacterial invasion of epithelial cells	7	1.34357	0.0483211	ENSG00000115091, ENSG00000180096, ENSG00000130429, ENSG00000184640, ENSG00000089159, ENSG00000136238, ENSG00000184009	281	77	8156	2.63863	0.999999	0.40056	0.380744
KEGG_PATHWAY	hsa05418:Fluid shear stress and atherosclerosis	10	1.91939	0.0495292	ENSG00000115594, ENSG00000104365, ENSG00000158517, ENSG00000100985, ENSG00000116701, ENSG00000170345, ENSG00000067182, ENSG00000136238, ENSG00000108984, ENSG00000184009	281	139	8156	2.08812	0.999999	0.40056	0.380744
KEGG_PATHWAY	hsa05162:Measles	10	1.91939	0.0495292	ENSG00000183735, ENSG00000104365, ENSG00000136869, ENSG00000118503, ENSG00000173110, ENSG00000170581, ENSG00000064012, ENSG00000112576, ENSG00000183486, ENSG00000170345	281	139	8156	2.08812	0.999999	0.40056	0.380744
KEGG_PATHWAY	hsa04144:Endocytosis	15	2.87908	0.0505078	ENSG00000180871, ENSG00000148341, ENSG00000173110, ENSG00000160948, ENSG00000163464, ENSG00000120318, ENSG00000141480, ENSG00000130429, ENSG00000115091, ENSG00000084070, ENSG00000164961, ENSG00000197081, ENSG00000182149, ENSG00000186635, ENSG00000140443	281	251	8156	1.73456	1	0.40056	0.380744
KEGG_PATHWAY	hsa04216:Ferroptosis	5	0.959693	0.0509546	ENSG00000110911, ENSG00000167996, ENSG00000151726, ENSG00000168003, ENSG00000100983	281	41	8156	3.53962	1	0.40056	0.380744
KEGG_PATHWAY	hsa04140:Autophagy - animal	10	1.91939	0.0533491	ENSG00000183735, ENSG00000035664, ENSG00000148572, ENSG00000168010, ENSG00000189403, ENSG00000165699, ENSG00000062716, ENSG00000003402, ENSG00000164733, ENSG00000140443	281	141	8156	2.0585	1	0.40435	0.384347
KEGG_PATHWAY	hsa05416:Viral myocarditis	6	1.15163	0.0542944	ENSG00000064012, ENSG00000114867, ENSG00000179344, ENSG00000160255, ENSG00000136238, ENSG00000184009	281	60	8156	2.90249	1	0.40435	0.384347
KEGG_PATHWAY	hsa05202:Transcriptional misregulation in cancer	12	2.30326	0.0681597	ENSG00000175197, ENSG00000113916, ENSG00000170458, ENSG00000127152, ENSG00000100985, ENSG00000125952, ENSG00000099860, ENSG00000132475, ENSG00000140379, ENSG00000108654, ENSG00000122025, ENSG00000140443	281	193	8156	1.80466	1	0.494595	0.470127
KEGG_PATHWAY	hsa05210:Colorectal cancer	7	1.34357	0.074641	ENSG00000081059, ENSG00000099860, ENSG00000076242, ENSG00000170345, ENSG00000136238, ENSG00000163235, ENSG00000134982	281	86	8156	2.36249	1	0.528085	0.501961
